# Supplementary material for: Synthesis of tripodal [2]rotaxanes: high concentration principleElectronic supplementary information (ESI) available: experimental details. See http://www.rsc.org/suppdata/cc/b2/b209836a/
Source: Royal Society of Chemistry journal article supplement (doi:10.1039/b209836a), 2002-12-20
Supplement: b209836a.doc [file b209836a.doc]

**Synthesis of Tripodal [2]Rotaxanes: High Concentration Principle**

Kirill Nikitin, Brenda Long and Donald Fitzmaurice.

## Department of Chemistry, University College Dublin, Belfield, Dublin 4, Ireland

**Supporting information**

**General**. NMR spectra were recorded using a Varian Inova 300 machine in the indicated solvent at 30 C. Proton NMR spectra were recorded at 299.89 MHz, phosphorus NMR spectra at 121.39 MHz. Melting points were estimated using a Gallenkamp melting point device and were not corrected. Mass spectra were recorded on a Finnigan Mat INCOS 50 Quadrupole Mass Spectrometer.

Reagents and solvents were purchased from Aldrich Co. and were used as received.

All reactions were performed under nitrogen. The glassware was flame dried. The chromatography separations were performed using silica (Merck, 40-63 micron) and MeOH/MeNO2/1M aqueous NH4PF6 80/19/1 by volume solvent system for all ionic products.

**Bis-para-phenylene-34-crown-10 (3):** was prepared according to the procedure reported.1

**4-[2-[2-[4-tris{4-t-butylphenyl}methylphenoxy]ethoxy]ethoxybenzyl alcohol, 4-[2-[2-[4-[4-Ethylphenyl-bis{4-t-butylphenyl}methyl]phenoxy]ethoxy]-ethoxybenzyl alcohol, 4-tris{4-t-butylphenyl}methylphenol** were prepared according to literature procedure.2

**4-[2-[2-[4-tris{4-t-butylphenyl}methylphenoxy]ethoxy]ethoxybenzylbromide (6a)**:

Solution of PBr3 (0.11 g, 0.4 mmol) ) in THF (0.5 ml) was added to a stirred solution of 4-[2-[2-[4-tris{4-t-butylphenyl}methylphenoxy]ethoxy]ethoxybenzyl alcohol (280 mg, 0.4 mmol) in THF (10 ml) at 0 oC. After 5 h Et2O (50 ml) was added and the mixture was washed with NaHCO3, the ether layer was dried over MgSO4 and concentrated to furnish bromide (0.30 g, 99%) as a colourless solid: mp 148 oC; 1H NMR (CDCl3) 7.3 (m, 8H), 7.00 (d, 8H, J = 9.0), 6.80 (d, 2H, J = 8.5 Hz) , 6.70 (d, 2H, J = 9 Hz), 4.41 (s, 2H), 4.12 (m, 4H), 3.86 (m, 4H), 1.23 (s, 27H); MS m/z 760 (79Br); Anal. Calcld. for C48H57BrO3: C, 75.67; H, 7.54; Br, 10.49; Found: C, 75.50; H, 7.55; Br, 10.70.

**4-[2-[2-[4-[4-Ethylphenyl-bis{4-t-butylphenyl}methyl]phenoxy]ethoxy]-ethoxybenzylbromide (6b)**:

this was prepared similarly in 100% yield. Colourless glass: 1H NMR  (CDCl3) 7.3 (m, 8H), 7.06 (d, 8H, J = 9.0), 6.80 ( d, 2H, J = 9 Hz), 6.0 ( d, 2H, J = 9 Hz), 4.41 (s, 2H), 4.12 (m, 4H), 3.84 (m, 4H), 2.54 (q, 2H, J= 7.5 Hz), 7.3 (m, 8H), 7.00 (d, 8H, J = 9.0), 4.47 (s, 2H), 4.12 (m, 4H), 3.90 (m, 4H), 1.22 (s, 18H), 1.16 (t, 3H, J= 7.5 Hz); MS m/z 731 (79Br); Anal. Calcld. for C46H53BrO3: C, 75.29; H, 7.28; Br, 10.89; Found: C, 75.17; H, 7.08; Br, 11.00

**(4-[bis{4-t-butylphenyl-4-ethylphenyl }methyl] phenoxymethylbenzylbromide (6c):**

Solution of dibromo-p-xylene (0.11 g, 0.4 mmol) ) in acetone (2 ml) was added to a stirred solution of 4-[bis{4-t-butylphenyl-4-ethylphenyl }methyl] phenol (95 mg, 0.2 mmol) and potassium carbonate (66 mg, 0.4 mmol) in acetone (2 ml) at 50 oC. After 10 h the mixture was filtered and separated to furnish product (0.10 g, 75%) as a colourless solid: mp 122 oC; 1H NMR (CDCl3) 7.3 (m, 6H), 7.1 (m, 12H), 6.84 ( d, 2H, J = 9 Hz), 5.05 ( s, 2H), 4.53 (s, 2H), 2.4 (q, 2H, J = 7.5 Hz), 1.32 (s, 18H), 1.25 (t, 3H, J = 7 Hz); MS m/z 657 (79Br); Anal. Calcld. for C43H47BrO: C, 78.28; H, 7.18; Br, 12.11; Found: C, 78.07; H, 7.22; Br, 11.95.

**1-{4-[tris{4-(4-phosphonodiethoxyphenyl)-phenyl}-methyl]-phenyl}-4,4’-bipyridinium hexafluorophosphate (4d**PF6**)**

was prepared in 4 steps from 4,4’-dibromobiphenyl in 9.6 % total yield.3

1-[4-[2-[2-[4-tris{4-t-butylphenyl}methylphenoxy]ethoxy]ethoxybenzyl]-4,4’-bipyridinium hexafluorophosphate (4aPF6):

4,4’-Bipyridyl (20 mg, 0.13 mmol), toluene (2 ml) and acetonitrile (5 ml) were added to 6a (0.100 g, 13.3 mcmol), and the mixture was heated at 80 oC for 5 h, chromatography gave the salt (80 mg, 60%) as a white solid: mp 222 oC; 1H NMR (300 MHz, CDCl3)  8.75 (d, 4H, J = 7 Hz), 8.13 (d, 2H, J = 7 Hz), 7.72 (s, 2H), 7.32 (d, 2H, J = 9 Hz), 7.14 (d, 6H, J = 9 Hz), 7.01 (d, 2H, J = 9 Hz), 7.00 (d, 6H, J = 9 Hz), 6.90 (d, 2H, J = 9 Hz), 6.69 (d, 2H, J = 9 Hz), 5.62 (s, 2H), 4.05 (m, 4H), 3. 85 (m, 4H), 1.21 (s, 27 H); 31P NMR (CDCl3)  143 (heptet, J = 711 Hz); MS (ES) m/z 837 (M+, 4 %), 835 (M-2H, 81 %). Anal. Calcd. For C58H65F6N2O3P: C, 70.66; H, 6.66, N, 2.85. Found C, 70.46; H, 6.74; N, 2.79.

**1-{4-[2-[2-[4-[4-Ethylphenyl-bis{4-t-butylphenyl}methyl]phenoxy]-ethoxy]ethoxybenzyl}-4,4’-bipyridinium hexafluorophosphate (4bPF6)**

this was prepared similarly in 95% yield. White solid: mp 160 oC; 1H NMR (CDCl3)  8.63 (d, 4H, J = 7 Hz), 7.98 (d, 2H, J =7 Hz), 7.58 (s, 2H), 7.25 (d, 2H, J = 9 Hz), 7.11 (d, 6H, J = 8 Hz), 7.00 (d, 2H, J = 8 Hz), 6.99 (d, 6H, J = 8 Hz), 6.78 (d, 2H, J = 8 Hz), 6.62 (d, 2H, J = 9 Hz), 5.51 (s, 2H), 3.99 (m, 4H), 3. 78 (m, 4H), 2.51 (q, 2 H, J = 8 Hz), 1.19 (s, 18 H), 1.12 (t, 3H, J = 7 Hz); 31P NMR (CDCl3)  143 (heptet, J = 711 Hz); MS (ES) m/z (); Anal. Calcld. for C56H61F6N2O3P: C, 70.42; H, 6.44; N, 2.93. Found: C, 70.07; H, 6.32; N, 2.73.

**1-{4-[4-tris{4-t-butylphenyl}methylphenoxymethyl]benzyl}-4,4’- bipyridinium hexafluorophosphate (4cPF6)**

this was prepared similarly in 99% yield. White solid: mp 168 oC; 1H NMR (CDCl3)  8.64 (d, 2H, J = 7 Hz); 8.61 (d, 2H, J = 5 Hz), 8.00 (d, 2H, J = 6.5 Hz), 7.51 (d, 2H, J = 5.5 Hz), 7.35 (s, 4H), 7.11 (d, 4H, J = 8.5 Hz), 7.00 (m, 10H), 6.78 (d, 2H, J = 8 Hz), 6.64 (d, 2H, J = 9 Hz), 5.60 (s, 2H), 4.82 (s, 2H), 2.51 (q, 2 H, J = 8 Hz), 1.19 (s, 18 H), 1.11 (t, 3H, J = 7 Hz); 31P NMR (CDCl3)  143 (heptet, J = 711 Hz); MS (ES) m/z 734 (M+, 9%), 732 (M+-2H, 100%); Anal. Calcld. for C53H55 F6N2OP: C, 72.26; H, 6.29; N, 3.18. Found: C, 72.07; H, 6.13; N, 2.90.

**1,1’-bi s-(4-(2-(2-(4-[tris{4-t-butylphenyl}-methyl]-phenoxy)-ethoxy)-ethoxy)-benzyl)- 4,4’-bipyridinium bis(hexafluorophosphate) (2e**2PF6**)** and **1,1’-bi s-(4-(2-(2-(4-[tris{4-t-butylphenyl}-methyl]-phenoxy)-ethoxy)-ethoxy)-benzyl)- 4,4’-bipyridinium****bis-para-phenylene-34-crown-10 bis(hexafluorophosphate)**

**(1e**2PF6**):**

4,4’-bipyridyl (1.54 mg, 0.01 mmol) and **6a** (30 mg, 0.04 mmol) were added to **3** (10.7 mg, 0.02 mmol) in benzonitrile (0.06 ml, C**3** = 0.2) and the mixture was left at ambient temperature for 10 days. The residue was purified by chromatography to give the rotaxane **1e****2PF6** (8.5 mg, 36%) and axial compound **2e****2PF6** (6.3 mg, 35%). **1e****2PF6**2: red solid, mp 200-210 oC (dec); 1H NMR (CDCl3)  8.84 (d, 4H, J = 7 Hz) , 7.93 (d, 4H, J = 7 Hz), 7.58 (d, 4H, J = 9 Hz), 7-7.2 (m, 28 H), 6.90 (d, 4H, J = 9 Hz), 6.75 (d, 4H, J = 9 Hz), 6.09 (s, 8H), 5.82 (s, 4H), 4.2 (m, 4H), 4.12 (m, 4H), 3.94 (m, 8H), 3.73 (m, 24H), 3.62 (m, 8H), 1.30 (s, 54 H); 31P NMR (CDCl3)  -143 (heptet , J = 712 Hz); MS (ES) m/z 1027.5 (M++, 10 %), 837 (100%). **2e****2PF6**2: beige solid; mp 200 oC (dec); 1H NMR (CDCl3)  8.80 (d, 4H, J = 7 Hz) , 8.24 (d, 4H, J = 7 Hz), 7.36 (d, 4H, J = 9 Hz), 7.0-7.2 (m, 28 H), 6.95 (d, 4H, J= 9Hz), 6.70 (d, 4H, J= 9Hz), 5.62 (s, 4H), 4.12 (m, 8H), 3.94 (m, 8H), 1.26 (s, 54 H); 31P NMR (CDCl3)  -143 (heptet , J = 712 Hz).

**1-{4-[tris{4-(4-phosphonodiethoxyphenyl)-phenyl}methyl]-phenyl}-1’-(4-(4-[bis{4-t-butylphenyl}-4-ethylphenylmethyl]-phenoxymethyl)-benzyl)-4,4’-bipyridinium hexafluorophosphate (2c****2PF6):**

**6c** (13 mg, 0.02 mmol) was added to **4d**2PF6 (0.012 g , 0.01 mmol) in benzonitrile (0.05 ml) and the mixture was heated at 80 oC for 6 h, the residue was purified by chromatography to give **2c**2PF6 (16 mg, 80 %) as a beige solid: mp 130 oC; 1H NMR (CDCl3)  9.12 (d, 2H, 7Hz), 9.00 (d, 2H, 7Hz), 8.55 (d, 2H, 7Hz), 8.43 (d, 2H, 7Hz), 7.8 (m, 6H), 7.7 (m, 10H), 7.5 (m, 10H), 7.36 (d, 6H , 9Hz), 7.15 (d, 4H, 9Hz), 7.0 (m, 10H), 6.73 (d, 2H, 9Hz) , 5.79 (s, 2H), 4.96 (s, 2H), 4.1 (m , 12 H), 2.52 (q, 2H, 7Hz), 1.26 (t, 18 H, J = 7 Hz), 1.20 (s, 18H), 1.13 (t, 3H, 7Hz); 31P NMR (CDCl3)  20.4 (s), -143 (hepetet, J = 712 Hz); MS (ES) m/z 1690 (M+, 57%), 1111 (100%); Anal. Calcld. for C108H113 F12N2O10P5: C, 65.45; H, 5.75; N, 1.41. Found: C, 65.21; H, 5.70; N, 1.40.

**1-{4-[tris{4-(4-phosphonodiethoxyphenyl)-phenyl}methyl]-phenyl}-1’-(4-(4-[bis{4-t-butylphenyl}-4-ethylphenylmethyl]-phenoxymethyl)-benzyl)-4,4’-bipyridinium bis-para-phenylene-34-crown-10 bis(hexafluorophosphate) rotaxane hexafluorophosphate (1c****2PF6): 2c**2PF6 (16 mg, 0.008 mmol) was heated with **3** in benzonitrile (0.04 ml) at 60 oC for 5 days. The residue was purified by chromatography to give orange sample of **2c2PF6**. NMR analysis has shown the presence of characteristic rotaxane peaks at 6.1 ppm corresponding to 5% of rotaxane **1c** formation.

**1-{4-[tris{4-(4-phosphonodiethoxyphenyl)-phenyl}methyl]-phenyl}-1’-(4-(2-(2-(4-[bis{4-t-butylphenyl}-4-ethylphenylmethyl]-phenoxy)-ethoxy)-ethoxy)-benzyl)-4,4’-bipyridinium bis(hexafluorophosphate) (2b****2PF6)** and **1-{4-[tris{4-(4-phosphonodiethoxyphenyl)-phenyl}methyl]-phenyl}-1’-(4-(2-(2-(4-[bis{4-t-butylphenyl}-4-ethylphenylmethyl]-phenoxy)-ethoxy)-ethoxy)-benzyl)-4,4’-bipyridinium bis(hexafluorophosphate) bis-para-phenylene-34-crown-10 bis(hexafluorophosphate) rotaxane (1b****2PF6):**

**6b** (30 mg, 0.04 mmol) and **3** (16 mg, 0.03 mmol) were added to **4d**2PF6 (0.025 g , 0.02 mmol) in benzonitrile (0.06 ml, C 0.2 M) at room temperature. After 5 days the residue was purified by chromatography to give rotaxane **1b** (38 mg, 75%) and **2b** (10 mg, 24 %). **1b:** red solid; mp 162 oC; 1H NMR (CDCl3)  9.06 (d, 2H, J= 7 Hz) 8.81 (d, 2H, J = 7 Hz), 8.10 (d, 2H, J = 7 Hz), 7.8-8.0 (m, 12 H), 7.75 (m, 6H), 7.64 (m, 8H), 7.50 (d, 6H, J = 9 Hz), 7.24 (d, 4H, J = 9 Hz), 7.1 (m, 12H), 6.80 (d, 2 H, J = 9 Hz), 6.26 (s, 8H), 5.69 (s, 2H), 4.1 (m, 16 H), 3.92 (m, 4H), 3.68 (m, 32 H), 2.63 (q, 2H, J = 7 Hz), 1.37 (t, 18 H, J = 7 Hz), 1.31 (s, 18 H), 1.24 (t, 3 H, J = 7 Hz); 31P NMR (CDCl3)  19.99 (s), -143 (heptet, J = 712 Hz); MS (ES) m/z 1150 (M++, 52 %) , 1111 (100%); Anal. Calcld. for C139H159 F12N2O22P5: C, 64.39; H, 6.18; N, 1.08. Found: C, 64.12; H, 6.00; N, 1.11.

**2b:** beige solid; mp 170 oC; 1H NMR (CDCl3)  9.03 (d, 2H, J = 7 Hz), 8.88 (d, 2H, J = 7 Hz) , 8.52 (d, 2H, J = 7 Hz), 8.41 (d, 2 H, J = 7 Hz), 7.8 (m, 6H), 7.6 (m, 10H), 7.52 (d, 6H, J = 9 Hz), 7.35 ( d, 6H, J = 9 Hz), 7.14 (d, 4H, J = 9 Hz), 7.0 (m, 10 H), 6.92 (d, 2H, J = 9 Hz), 6.59 (d, 2H, J = 9 Hz) , 5. 70 (s, 2H), 4,1 (m, 16H), 3.9 (m, 4H), 2.56 (q, 2H, J = 7 Hz), 1.30 (t , 18 H, J = 7 Hz), 1.24 (s, 18 H), 1.17 (t, 3H, J = 7 Hz); 31P NMR (CDCl3)  20.27 (s), -143 (hept, 710 Hz); MS (m/z) 1762 (7 % , M+-2H), 1110 (100%); Anal. Calcld. for C111H119 F12N2O12P5: C, 64.84; H, 5.83; N, 1.36. Found: C, 70.02; H, 5.76; N, 1.19.

**1-(4-(2-(2-(4-[bis{4-t-butylphenyl}-4-ethylphenylmethyl]-phenoxy)-ethoxy)-ethoxy)-benzyl)-1’-(4-(4-[bis{4-t-butylphenyl}-4-ethylphenylmethyl]-phenoxymethyl)-benzyl)- 4,4’-bipyridinium)** **bis-para-phenylene-34-crown-10 rotaxane hexafluorophosphate (1f****2PF6):**

this was prepared similarly in 84 % yield. Red solid mp 120 oC; 1H NMR (CDCl3)  8.90 (d, 2H, J = 7 Hz), 8.83 (d, 2H, J = 7 Hz), 7.9 (m, 4H), 7.6 (m, 6H), 7.24 (m, 8H), 7.1 (m, 22 H), 6.86 (d, 2H, J = 9 Hz), 6.80 (d, 2H, J = 9 Hz), 6.09 (s, 8H), 5. 85 (s, 2H), 5.81 (s, 2H), 5. 12 (s, 2H), 4.25 (m, 2H), 4.15 (m, 2H), 3.95 (m, 4H), 3.78 (m 16 H), 3.72 (m, 8H), 3.65 (m, 8H), 2.64 (q, 4H, J = 7 Hz), 1.32 (s, 36 H), 1.25 (t, 6H, J = 7 Hz); 31P NMR (CDCl3)  -143 (heptet, 711 Hz); MS (ES) m/z 1925 (M+, 24 %), 735 (100%). Anal. Calcld. for C127H148 F12N2O14P2: C, 68.82; H, 6.73; N, 1.26. Found: C, 68.44; H, 6.60; N, 1.22.

**1,1’-bis-(4-(2-(2-(4-[ bis{4-t-butylphenyl}-4-ethylphenylmethyl]-phenoxy)-ethoxy)-ethoxy)-benzyl)- 4,4’-bipyridinium****bis-para-phenylene-34-crown-10 bis(hexafluorophosphate) (1g****2PF6):**

thiswas prepared similarly in 90 % yield. Red solid mp 140-142 oC;2 1H NMR (CDCl3)  8.74 (d, 4H, J = 7 Hz), 7.79 (d, 4H, J = 7 Hz), 7.50 (d, 4H, J = 9 Hz), 7.14 (d, 8H, J = 9 Hz), 7.0 (m, 24H), 6.70 (4H, d, 9Hz), 6.00 (s, 8H), 5.69 (s, 4H), 4.14 (m, 4H), 4.06 (m, 4H), 3.86 (m, 8H), 3.6 (m, 24H), 3.55 (m, 8H), 2.54 (q, 4H, 7Hz), 1.22 (s, 36 H), 1.15 (t. 6H, 7 Hz); 31P NMR (CDCl3)  - 143 (heptet, J = 711 Hz).

**1-{4-[tris{4-(4-phosphonodiethoxyphenyl)-phenyl}methyl]-phenyl}-(4-(2-(2-(4-[tris{4-t-butylphenyl}-methyl]-phenoxy)-ethoxy)-ethoxy)-benzyl)- 4,4’-bipyridinium)****bis-para-phenylene-34-crown-10 rotaxane hexafluorophosphate (1a****2PF6):**

thiswas prepared similarly in 48 % yield. Red solid; mp 152oC; 1H NMR (CDCl3)  9.06 (d, 2H, J = 7 Hz), 8.81 (d, 2H, J = 7 Hz), 8.02 (d, 2H, 7Hz), 7.88 (d, 2H, 7Hz), 7.8 (m, 10H), 7.7 (m, 8 H,), 7.62 (d, 6H, 9 Hz), 7.50 (6H, d, 9 Hz), 7.20 (d, 6H, 9 Hz), 7.1 (m, 10H), 6.75 (d, 2H, 9Hz), 6.20 (s, 8H), 5.76 (s, 2H), 4.1 (m, 16 H), 3.9 (m, 4 H), 3.6 (m, 24 H), 3.5 (m, 8H), 1.32 (t, 18 H, 7 Hz), 1.26 (s, 27 H); 31P NMR (300 MHz, CDCl3)  20.36 (s), - 143 (heptet, J = 708 Hz). Anal. Calcld. for C141H163 F12N2O22P5: C, 64.62; H, 6.27; N, 1.07. Found: C, 64.41; H, 6.28; N, 1.00.

References:

1. P.L. Anelli, P.R.Ashton, R.Ballardini, V.Balzani, M.Delgado, M.T.Gandolfi, T.T.Goodnow, A.E.Kaifer, D.Philp, M.Pietraszkiewicz, L.Prodi, M.V.Reddington, A.M.Z.Slavin, N.Spencer, J.F.Stoddart, C.Vincenti and D.J.Williams, *J. Am. Chem. Soc*.; **1992**, 114, 193-218.

2. P.R. Ashton, R. Ballardini, V. Balzani, M. Belohragdsy, M.T. Gandolfi, D. Philp, L. Prodi, F.M. Raymo, M.V. Reddington, N. Spencer, J.F. Stoddart, M. Venturi, and D.J. Williams,  *J. Am. Chem. Soc.*, 1996, **118**, 4931.

3. B.O. Long., K.V. Nikitin, D. Fitzmaurice, Self assembly of a tripodal pseudorotaxane on the surface of titanium oxide nanoparticles, (submitted).
